# Supplementary material
Source: PubMed Central journal article supplement (PMC3061442)

## Supplemental Figure Legends

**Supplemental Figure 1.** Comparison of systemic humoral and protective anti-OprF immunity following intramuscular immunization with AdC7OprF and Ad5OprF at different doses.

C57BL/6 mice were immunized with AdC7OprF (black symbols), Ad5OprF (grey symbols) at a dose of  $10^9$  (circle),  $10^{10}$  (diamond) and  $10^{11}$  (square) pu/mouse or left untreated (Naive, open circle). **A.** Serum anti-OprF IgG antibodies were analyzed 0, 4, 8 and 12 wk following administration by ELISA using recombinant OprF as antigen. Data are shown as mean  $\pm$  SEM, n=4/group. The dashed line represents the limit of detection. \* denotes significance of  $p < 0.05$  between AdC7OprF and Ad5OprF at the corresponding dose. **B.** Protection against pulmonary challenge with *P. aeruginosa*. 12 wk following immunization mice (n=4/group) were challenged with a lethal intratracheal dose of agar-encapsulated *P. aeruginosa* ( $10^6$  cfu), and survival was monitored for 6 days.

### A. IgG

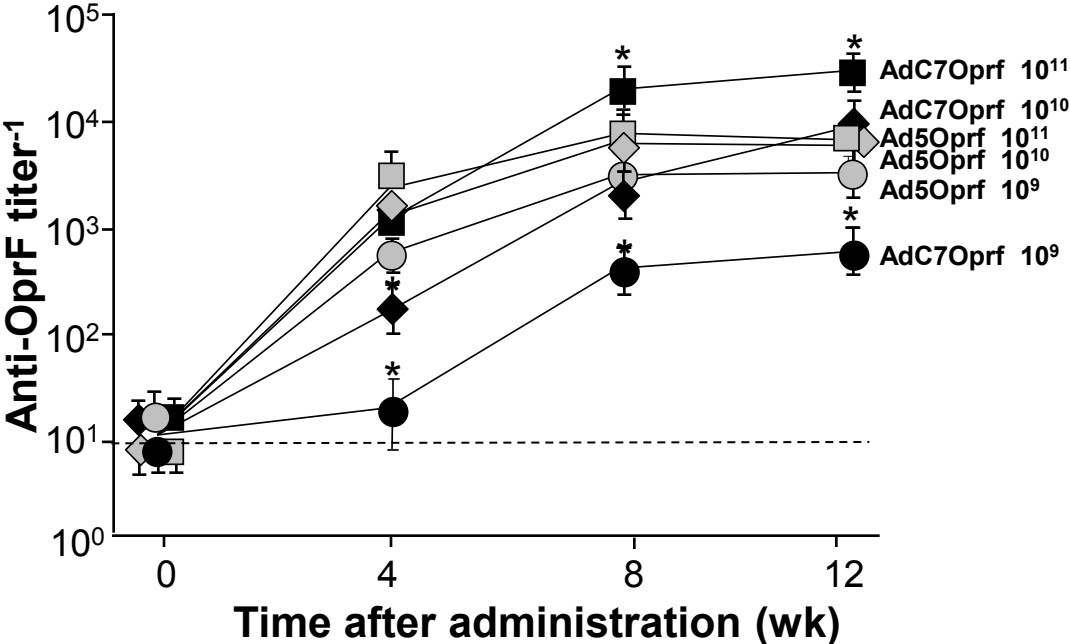

### B. Survival

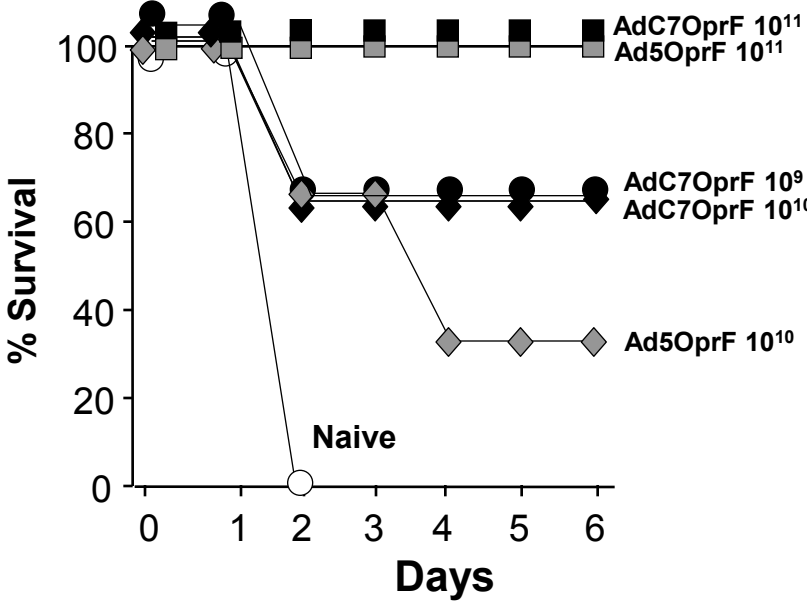

Supplement: NIHMS262354-supplement-01.pdf [file NIHMS262354-supplement-01.pdf]
